# Supplementary material for: Robust Salmonella metabolism limits possibilities for new antimicrobials
Source: Springer Nature journal article supplement (doi:10.1038/nature04616), 2006-03-15
Supplement: nature04616-s01.pdf [file nature04616-s01.pdf]

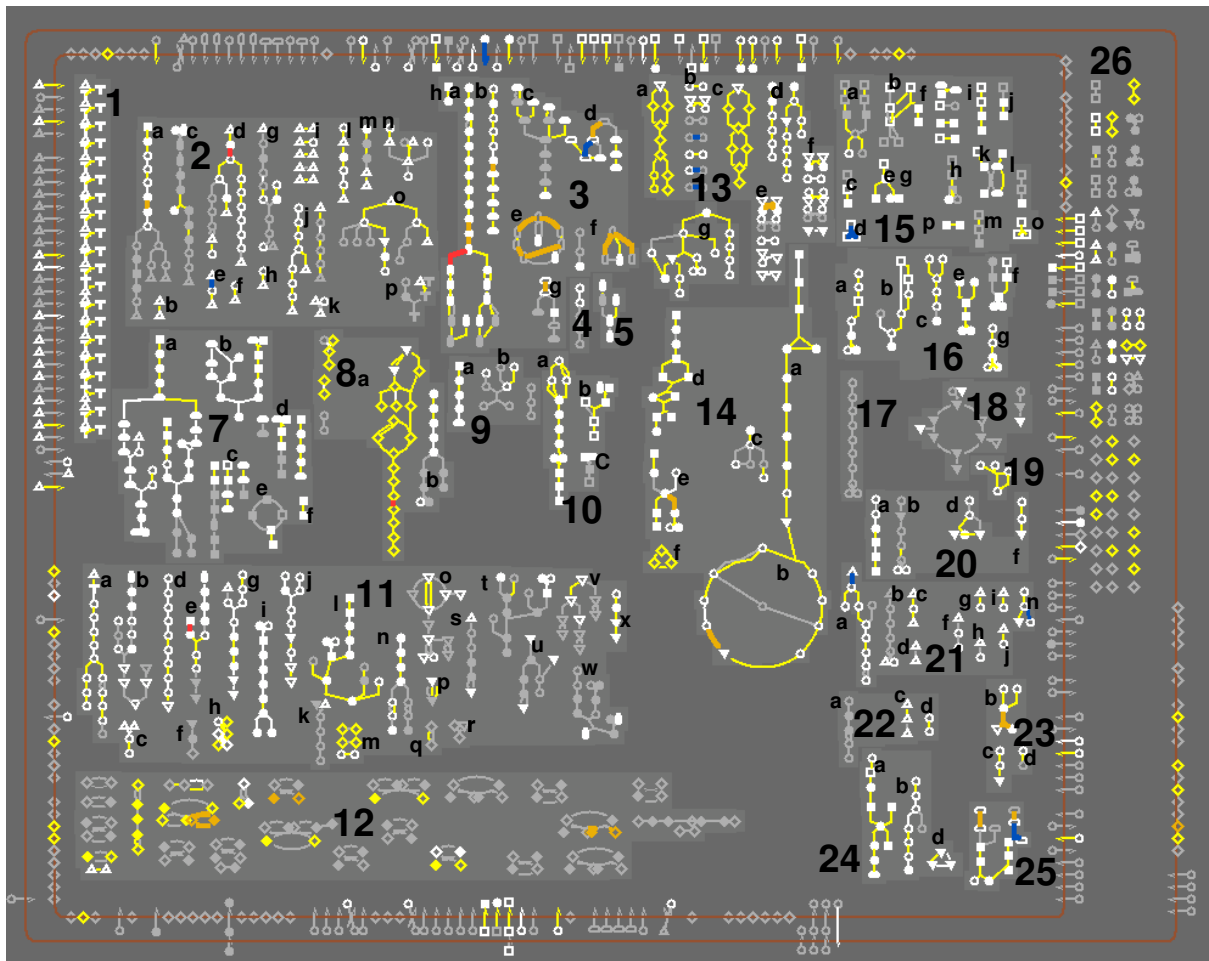

**Supplemental Figure 1: Overview of *Salmonella* metabolism during enteritis.** Symbols represent metabolites, connecting lines represent enzymes catalyzing the corresponding reactions. Detected enzyme expression (yellow) and *in vivo* enzyme relevance (red, essential; orange, contributing to virulence; blue, dispensable), indirectly inferred enzymes and metabolites (white), and metabolites and enzymes with no available *in vivo* evidence (grey) are shown. Brown lines represent the two *Salmonella* membranes. Pathway numbers correspond to Supplemental Tab. 3.
